# Supplementary material for: Endoscopic duodenal mucosal resurfacing improves glycaemic and hepatic indices in type 2 diabetes: 6-month multicentre results
Source: PubMed Central journal article supplement — JHEP Rep. 2019 Nov 5;1(6):429–37. doi: 10.1016/j.jhepr.2019.10.006 (PMC7005649; doi:10.1016/j.jhepr.2019.10.006), 2019-11-05
Supplement: mmc1.pdf [file mmc1.pdf]

## Journal of Hepatology

### CTAT methods

#### Endoscopic duodenal mucosal resurfacing improves glycaemic and hepatic indices in type 2 diabetes: 6-month multi-centre results

##### 1.1 Antibodies

| Name | Citation | Supplier | Cat no. | Clone no. |
|------|----------|----------|---------|-----------|
| NA   |          |          |         |           |

##### 1.2 Cell lines

| Name | Citation | Supplier | Cat no. | Passage no. | Authentication test method |
|------|----------|----------|---------|-------------|----------------------------|
| NA   |          |          |         |             |                            |

##### 1.3 Organisms

| Name | Citation | Supplier | Strain | Sex | Age | Overall n number |
|------|----------|----------|--------|-----|-----|------------------|
| NA   |          |          |        |     |     |                  |

##### 1.4 Sequence based reagents

| Name | Sequence | Supplier |
|------|----------|----------|
| NA   |          |          |

##### 1.5 Biological samples

| Description | Source | Identifier |
|-------------|--------|------------|
| NA          |        |            |

##### 1.6 Deposited data

| Name of repository | Identifier | Link |
|--------------------|------------|------|
| NA                 |            |      |

##### 1.7 Software

| Software name   | Manufacturer | Version |
|-----------------|--------------|---------|
| Array Studio    | Omicsoft     | 7.2     |
| R               | Open sourced | 3.3.0   |
| SPSS statistics | IBM          | 24.0    |

##### 1.8 Other (e.g. drugs, proteins, vectors etc.)

|  |  |  |
|--|--|--|
|  |  |  |
|--|--|--|

**1.9 Please provide the details of the corresponding methods author for the manuscript:**

**Corresponding author: Prof. Jacques J.G.H.M. Bergman  
Corresponding author metabolomics analysis: Kari Wong**

**2.0 Please confirm for randomised controlled trials all versions of the clinical protocol are included in the submission. These will be published online as supplementary information.**

**NA**
